# Supplementary material for: Preparation of non-fullerene acceptors with a multi-asymmetric configuration in a one-pot reaction for organic solar cells
Source: Royal Society of Chemistry journal article supplement (doi:10.1039/d0tc04749j), 2020-01-01
Supplement: d0tc04749j1.pdf [file d0tc04749j1.pdf]

# Electronic Supporting Information

## Preparing Non-fullerene Acceptors with Multi-asymmetric Configuration in One-pot Reaction for Organic Solar Cells

Yi Zhang, Yan Wang, Ziyi Xie, Tong Shan, Lei Zhu, Feng Liu and Hongliang Zhong\*

School of Chemistry and Chemical Engineering, Frontiers Science Center for Transformative Molecules, Shanghai Key Lab of Electrical Insulation and Thermal Aging, Shanghai Jiao Tong University, Shanghai 200240, China.

Email: hlzhong@sjtu.edu.cn

### General Procedure:

All reactions were carried out under argon using solvents and reagents as commercially supplied, unless otherwise stated. Compound 1, compound 2 and compound 3 were synthesized by the reported method.<sup>1</sup> <sup>1</sup>H NMR and <sup>13</sup>C NMR spectra were collected on a Bruker AV-400 (400 MHz) or a Bruker Advanced III (500 MHz) spectrometers and are given in ppm, the residual solvent resonance of CDCl<sub>3</sub> was used as an internal reference. UV-vis absorption spectra were measured by a PerkinElmer Lambda 750S recording spectrophotometer. Cyclic voltammetry (CV) measurements of the target products were conducted on a CHI660D voltammetric analyzer in dichloromethane solution with 0.1 M tetrabutylammonium hexafluorophosphate (*n*-Bu<sub>4</sub>NPF<sub>6</sub>) as supporting electrolyte at room temperature via conventional three-electrode configuration consisting of a platinum working electrode, a platinum wire counter electrode and an Ag/AgCl wire reference electrode. Grazing-incidence wide-angle x-ray scattering (GIWAXS) was carried out at beamline 7.3.3 Lawrence Berkeley National Lab (LBNL). The sample was put inside a helium chamber, and Pilatus 2M detector was used to collect the signal.

### Device Fabrication and Measurement:

#### Device Fabrication

The patterned indium tin oxide glass (ITO) glass substrates with sheet resistance of 15 Ω sq<sup>-1</sup> were used. They were cleaned with deionized water, acetone, chloroform, acetone, and isopropanol sequentially by ultra-sonic bath for 15 min each and then dried by N<sub>2</sub> gas. Then, 10 min UV-Ozone treatment was applied before use. The PEDOT-PSS solution was spin-coated onto the cleaned ITO glass substrate at 3000 rpm of 30s followed by annealing at 150 °C of 15 min in air. Then the PEDOT-PSS coated substrates were transferred into a nitrogen-filled glove box. PM6:acceptors blends were dissolved in chlorobenzene: CN (99.5: 0.5, v/v) at 60 °C and stirred overnight in a nitrogen-filled glove box. The active layers with optimized thicknesses were obtained by spin-coating the blend solution at room temperature with polymer concentrations of 10 mg mL<sup>-1</sup>. Then, a 10 mg mL<sup>-1</sup> ZnO nanoparticle solution was spin-coated onto the active layer at 3000 rpm for 40 s. Finally, the anode, 100 nm Al was deposited at a speed of 0.3 nm/s through a shadow mask by

thermal evaporation in a vacuum chamber of under  $3 \times 10^{-6}$  Torr to complete the device fabrication. Each device's active area was 3.64 mm<sup>2</sup>.

#### **OPV device characterization:**

The device J-V characteristics were recorded by a Keithley 2420 Source Meter unit in forward direction under AM 1.5G 1 sun irradiance (100 mW cm<sup>-2</sup>) as generated by a 300W Xe lamp solar simulator (Enlitech SS-F5-3A) at room temperature. Standard Si diode with KG-5 filter was used to calibrate the light intensity. Enlitech EQE system (Enlitech QE-M110) with a Si diode as reference cell was used to characterize the EQE spectra. Monochromatic light was generated from an Enlitech lamp source with a monochromator.

#### **Electron and hole mobility measurement:**

Hole-only diode configuration: ITO/PEDOT-PSS/blend films/MoO<sub>3</sub>/Al. PEDOT-PSS was firstly spin-coated onto the ITO-glass substrate. Then the following layer were deposited by the same procedure as OPV devices. Electron-only diode configuration: ITO/ZnO/blend films/ZnO/Al.

The mobility in blend films were determined by fitting the dark current hole/electron-only diodes to the space-charge limited current (SCLC) model. The mobility was determined by the equation:

$$J = \frac{9\epsilon_0\epsilon_r\mu_0V^2}{8L^3}$$

where  $J$  is current density,  $\mu_0$  is the hole or electron mobility,  $\epsilon_0$  is the dielectric permittivity of the active layer (generally taken to be about 3 for organic materials),  $\epsilon_r$  is the dielectric permittivity of free space,  $L$  is the film thickness, and  $V$  is the voltage, which is defined as  $V = V_{\text{appl}} - V_{\text{bi}}$ , where  $V_{\text{appl}}$  is the applied voltage,  $V_{\text{bi}}$  is the built-in voltage which is related to the difference in the work function of the electrodes.

#### **Synthesis:**

The synthesis of compound **3**

In a dry flask, compound **1** (320 mg, 0.30 mmol) and compound **2** (150 mg, 0.35 mmol) were added, then Pd(PPh<sub>3</sub>)<sub>4</sub> (17 mg, 5% mol) was added under argon atmosphere, followed by the addition of anhydrous toluene (10 mL). After being stirred at 110 °C overnight, the mixture was cooled to room temperature and extracted by ethyl acetate. The organic phase was dried over Na<sub>2</sub>SO<sub>4</sub> and then the solvent was removed with rotary evaporator. The crude product was purified by column chromatography on silica gel with dichloromethane: hexane (v/v, 1/1) as eluent to afford compound **3** (260 mg, 0.23 mmol, 75% yield) as a red solid. <sup>1</sup>H NMR (400 MHz, CDCl<sub>3</sub>)  $\delta$  9.83 (s, 1H), 7.59 (s, 1H), 7.43 - 7.08 (m, 5H), 6.98 (m, 1H), 4.29 (m, 2H), 2.07 - 1.94 (m, 4H), 1.88 (m, 4H), 1.73 (m, 1H), 1.51 - 1.30 (m, 8H), 1.30 - 1.00 (m, 36H), 1.00 - 0.70 (m, 26H) <sup>13</sup>C NMR (101 MHz, CDCl<sub>3</sub>) <sup>13</sup>C NMR (101 MHz, CDCl<sub>3</sub>),  $\delta$  178.66, 161.04, 156.88, 156.21, 154.02, 153.97, 151.83, 149.00, 147.32, 142.54, 141.36, 137.81, 134.21, 133.99, 129.12, 128.91, 127.53, 124.87, 124.77, 122.49, 121.84, 114.21, 113.31, 68.14, 54.55, 53.89, 39.17, 38.94, 31.91, 31.88, 30.53, 30.08, 30.04, 29.40, 29.37, 29.32, 29.05, 24.35, 24.27, 23.98, 23.07, 22.71, 14.18, 14.15, 11.17.

MS (MALDI-TOF)  $m/z$ : Calculated for [M<sup>+</sup>] 1054.58; found: 1054.52.

The synthesis of compound **4**

Phosphoryl chloride (0.19 mL, 2.0 mmol) was added dropwise into DMF (0.23 mL, 3.0 mmol) at 0 °C and stirred for 30 minutes to prepare Vilsmeier reagent. Compound **3** (220 mg, 0.19 mmol) was dissolved in 10 mL dichloromethane, then the fresh-made Vilsmeier reagent (0.40 mmol) was added dropwise into the mixture. After being stirred at room temperature for 2 h, the mixture was poured into ice water (50 mL) and neutralized with CH<sub>3</sub>COONa, and then extracted with dichloromethane (3×50 mL). The combined organic layer was washed with water and brine, dried over Na<sub>2</sub>SO<sub>4</sub>. After removal of solvent, it was purified by column chromatography on silica gel using a mixture of dichloromethane: hexane (v/v, 1/1) as eluent to afford compound **4** (164 mg, 0.14 mol, 74%) as a red solid. <sup>1</sup>H NMR (400 MHz, CDCl<sub>3</sub>) δ 9.91 (s, 1H), 9.85 (s, 1H), 7.62 (m, 2H), 7.45 (s, 1H), 7.38 (s, 1H), 4.29 (m, 2H), 2.10 - 1.84 (m, 8H), 1.72 (m, 1H), 1.51 - 1.31 (m, 8H), 1.28 - 1.11 (m, 40H), 1.00 - 0.73 (m, 26H). <sup>13</sup>C NMR (101 MHz, CDCl<sub>3</sub>) δ 182.90, 178.70, 160.89, 157.89, 155.74, 155.23, 154.30, 151.77, 148.75, 146.03, 145.28, 141.67, 136.92, 135.64, 135.27, 130.44, 129.48, 129.27, 124.61, 124.51, 123.04, 115.00, 114.18, 68.14, 54.65, 54.21, 38.97, 38.94, 38.84, 31.77, 31.76, 30.43, 29.90, 29.88, 29.26, 29.18, 28.95, 24.28, 23.88, 22.97, 22.60, 18.58, 14.07, 14.04, 11.07.

MS (MALDI-TOF) *m/z*: Calculated for [M<sup>+</sup>] 1082.58; found: 1082.59.

#### The synthesis of **2FIFIC** and **ICIF2F**

Compound **4** (300 mg, 0.28 mmol), 2FIC (126 mg, 0.55 mmol) and IC (107 mg, 0.55 mmol) were added in *n*-butanol (20 ml). Then the mixture was heated to 100 °C and kept stirring overnight. After cooling to room temperature, the solvent was removed. The crude product was purified by silica-gel column chromatography, and eluted with dichloromethane: hexane (2/1, v/v) to afford compound **2FIFIC** (110mg, 0.0748 mmol, 27%) and **ICIF2F** (100mg, 0.068 mmol, 24%) as a dark-green solid, with 2FIF2F (50 mg, 0.033 mmol, 11.8%) and ICIFIC (30 mg, 0.021 mmol, 7.5%) as the byproducts.

**2FIFIC**: <sup>1</sup>H NMR (400 MHz, CDCl<sub>3</sub>) δ 8.97 (s, 1H), 8.86 (s, 1H), 8.71 (m, 1H), 8.56 (m, 1H), 7.97 - 7.92 (m, 1H), 7.82 - 7.67 (m, 5H), 7.60 (s, 1H), 7.44 (s, 1H), 4.31 (m, 2H), 2.16 - 1.90 (m, 8H), 1.76 (m, 1H), 1.50 - 1.32 (m, 8H), 1.27 - 1.06 (m, 40H), 0.96 (m, 8H), 0.80 (m, 18H). <sup>13</sup>C NMR (101 MHz, CDCl<sub>3</sub>) δ 189.24, 186.09, 162.59, 160.44, 159.48, 159.11, 158.71, 157.36, 157.13, 155.84, 155.73, 155.38, 153.26, 153.12, 152.75, 152.68, 151.48, 149.15, 148.65, 146.97, 140.63, 140.24, 138.91, 138.79, 138.65, 136.96, 136.71, 136.21, 135.35, 134.64, 134.38, 130.72, 128.97, 128.76, 125.76, 125.69, 125.39, 123.67, 122.37, 120.75, 120.57, 117.01, 116.90, 116.28, 115.16, 114.97, 114.88, 114.77, 114.61, 112.75, 112.57, 69.24, 68.97, 68.64, 54.82, 54.50, 39.20, 39.14, 38.94, 31.90, 30.56, 30.03, 29.41, 29.35, 29.04, 24.54, 24.49, 24.02, 23.11, 22.73, 14.23, 14.19, 11.20.

MS (MALDI-TOF) *m/z*: Calculated for [M<sup>+</sup>] 1470.63; found: 1470.39.

**ICIF2F**: <sup>1</sup>H NMR (400 MHz, CDCl<sub>3</sub>) δ 8.99 (s, 1H), 8.83 (s, 1H), 8.73 - 8.69 (m, 1H), 8.54 (m, 1H), 7.97 - 7.92 (m, 1H), 7.80 (s, 1H), 7.77 (m, 2H), 7.72 (s, 1H), 7.68 (m, 1H), 7.59 (s, 1H), 7.44 (s, 1H), 4.31 (m, 2H), 2.08 (m, 4H), 2.01 - 1.90 (m, 4H), 1.76 (m, 1H), 1.50 - 1.34 (m, 8H), 1.15 (m, 40H), 1.00 - 0.92 (m, 8H), 0.80 (m, 18H). <sup>13</sup>C NMR (101 MHz, CDCl<sub>3</sub>) δ 188.44, 186.73, 161.07, 160.77, 160.28, 159.53, 157.21, 156.89, 156.84, 155.90, 155.76, 155.49, 153.57, 153.49, 153.31, 153.17, 153.07, 152.93, 151.40, 150.36, 148.57, 148.34, 140.91, 140.05, 138.61, 138.20, 138.06, 137.02, 136.80, 136.51, 135.12, 134.48, 134.21, 130.44, 128.92, 128.71, 126.37, 126.29, 125.36, 123.77, 122.01, 121.71, 119.41, 117.19, 117.07, 116.11, 115.06, 115.00, 114.91, 114.74, 114.41,

112.60, 112.42, 69.33, 68.72, 54.83, 54.49, 39.20, 39.11, 38.93, 31.89, 30.55, 30.03, 29.40, 29.34, 29.02, 24.53, 24.49, 24.01, 23.09, 22.72, 14.21, 14.18, 11.18.

MS (MALDI-TOF)  $m/z$ : Calculated for  $[M^+]$  1470.63; found: 1470.41.

**ICIFIC:**  $^1\text{H}$  NMR (400 MHz,  $\text{CDCl}_3$ )  $\delta$  8.99 (s, 1H), 8.87 (s, 1H), 8.71 (m, 2H), 7.94 (m, 2H), 7.87 - 7.68 (m, 6H), 7.59 (s, 1H), 7.43 (s, 1H), 4.31 (m, 2H), 2.01 (m, 8H), 1.81 - 1.72 (m, 1H), 1.55 - 1.30 (m, 10H), 1.15 (m, 36H), 0.89 (m, 28H).  $^{13}\text{C}$  NMR (101 MHz,  $\text{CDCl}_3$ )  $\delta$  188.95, 188.31, 161.25, 160.64, 160.25, 159.29, 158.56, 157.04, 156.79, 155.28, 152.69, 149.49, 147.13, 140.75, 140.03, 138.50, 137.99, 136.92, 136.60, 136.44, 135.02, 134.34, 134.07, 130.27, 125.84, 125.20, 123.63, 123.46, 122.15, 121.48, 120.36, 116.03, 114.90, 114.62, 69.02, 68.51, 54.71, 54.67, 54.37, 39.08, 38.83, 31.79, 30.46, 29.96, 29.30, 29.23, 28.94, 24.43, 23.92, 23.00, 22.62, 14.10, 14.06, 11.08.

MS (MALDI-TOF)  $m/z$ : Calculated for  $[M^+]$  1434.65; found: 1434.57.

**2FIF2F:**  $^1\text{H}$  NMR (400 MHz,  $\text{CDCl}_3$ )  $\delta$  8.99 (s, 1H), 8.71 (s, 1H), 8.56 (m, 1H), 8.47 (m, 1H), 7.85 (s, 1H), 7.76 (s, 1H), 7.71 (m, 1H), 7.64 (m, 2H), 7.51 (s, 1H), 4.34 (m, 2H), 2.21 - 1.90 (m, 8H), 1.84 - 1.74 (m, 1H), 1.53 - 1.34 (m, 8H), 1.31 - 1.08 (m, 40H), 0.91 (m, 26H).  $^{13}\text{C}$  NMR (101 MHz,  $\text{CDCl}_3$ )  $\delta$  186.72, 186.06, 162.35, 160.26, 159.73, 158.62, 157.49, 157.16, 156.74, 155.77, 155.59, 151.35, 150.13, 148.17, 140.74, 138.76, 138.65, 136.74, 136.53, 134.67, 134.20, 130.40, 130.39, 129.69, 128.96, 128.75, 126.27, 122.08, 120.68, 119.51, 117.30, 117.17, 116.31, 115.11, 114.70, 114.55, 114.37, 112.78, 112.58, 112.42, 110.25, 100.10, 93.65, 69.47, 69.11, 68.75, 54.89, 54.52, 39.19, 39.11, 38.94, 31.89, 30.56, 30.03, 30.01, 29.40, 29.35, 29.33, 29.03, 24.54, 24.50, 24.02, 23.09, 22.72, 14.21, 14.17, 11.18.

MS (MALDI-TOF)  $m/z$ : Calculated for  $[M^+]$  1506.62; found: 1506.72.

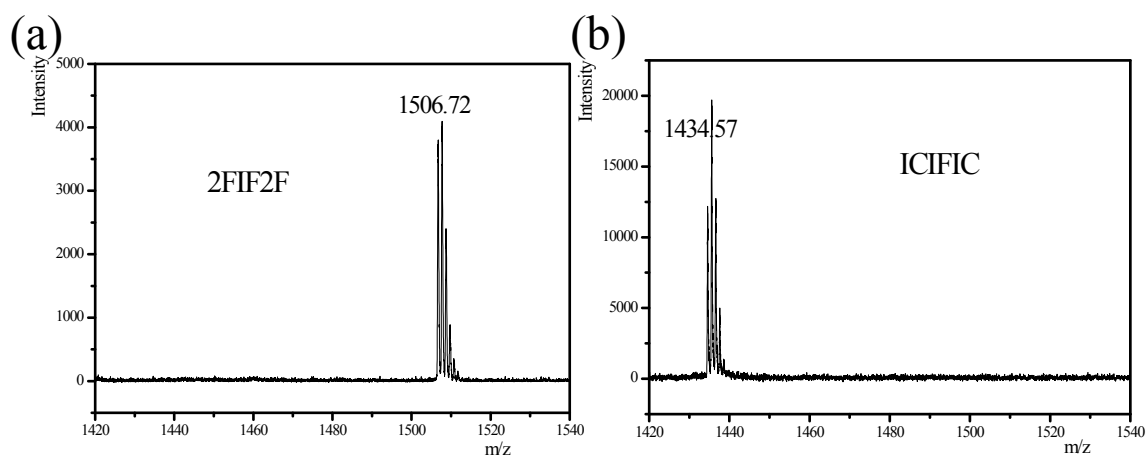

**Fig. S1.** The Mass spectra of (a) 2FIF2F and (b) ICIFIC.

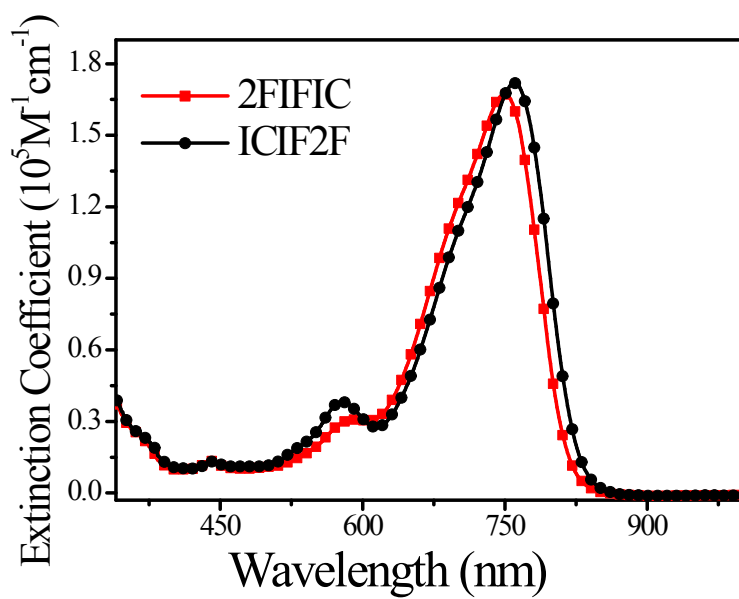

Fig. S2. The absorption spectra of the acceptors in dilute chloroform solution.

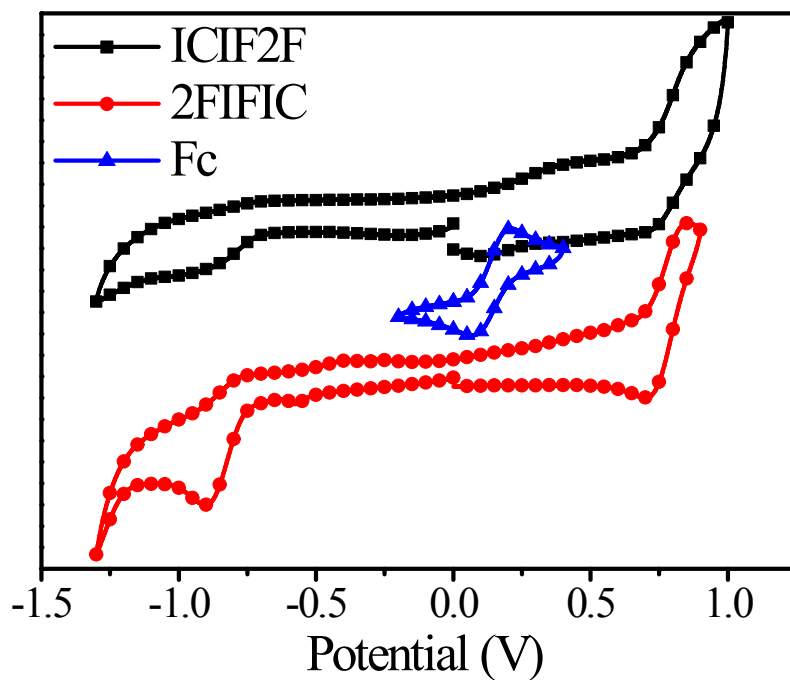

Fig. S3. Cyclic voltammetry curves of 2FIFIC and ICIF2F.

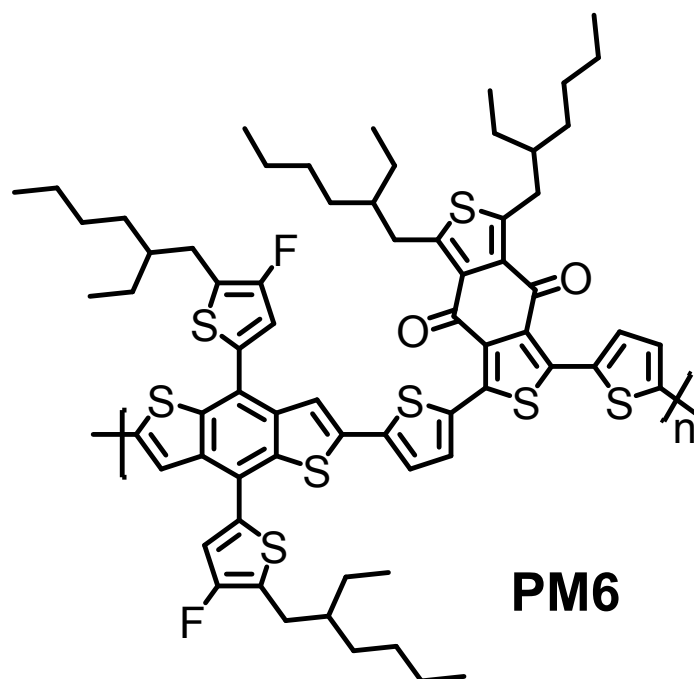

**Fig. S4.** Chemical structure of **PM6**.

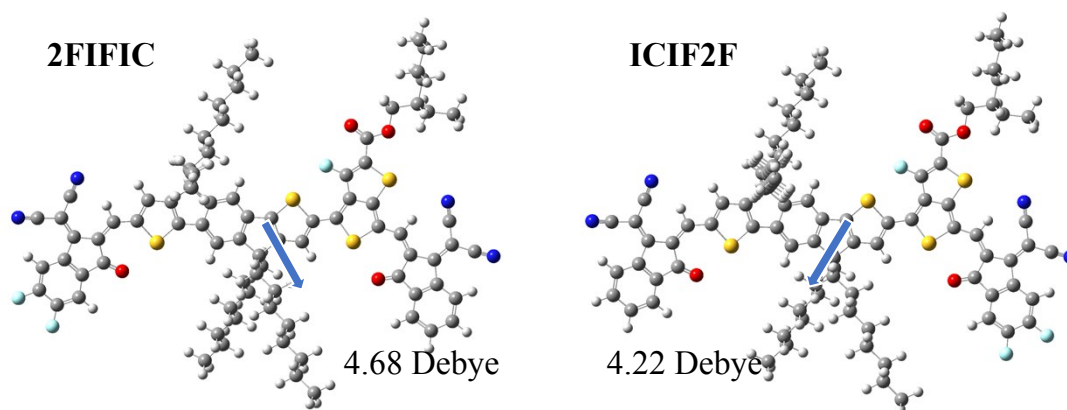

**Fig. S5.** The dipole moments of optimized geometries **2FIFIC** and **ICIF2F**. The simulations were performed by density functional theory (DFT) at B3LYP/6-31G level.

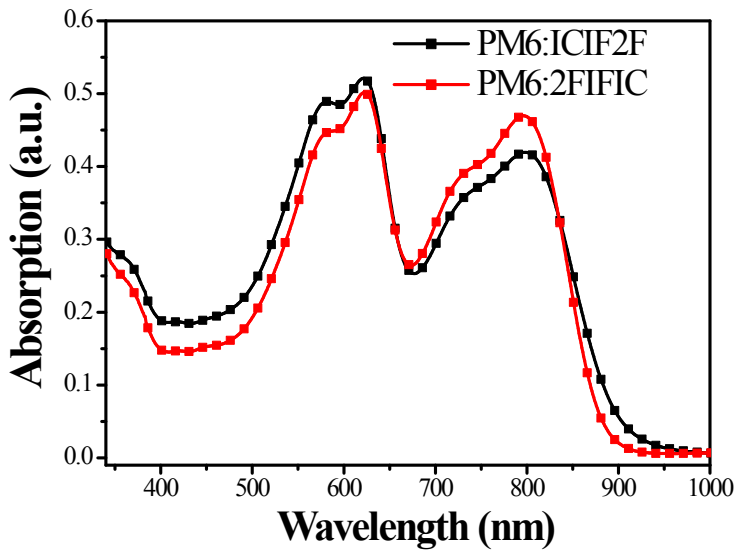

**Fig. S6.** The absorption spectra of the optimized blend film of **PM6**:acceptors.

**Table S1.** Photovoltaic parameters of OSCs based on **PM6**:acceptors with different D:A weight under the illumination of AM1.5G, 100 mW/cm<sup>2</sup>. The devices were in a conventional architecture ITO/PEDOT:PSS/**PM6**:acceptors/ZnO/Al.

| Active Layer | D:A ratio | $V_{oc}$ (V) | $J_{sc}$ (mA cm <sup>-2</sup> ) | FF (%) | PCE (%) |
|--------------|-----------|--------------|---------------------------------|--------|---------|
| PM6:2FIFIC   | 1:0.8     | 0.86         | 18.36                           | 51.4   | 8.12    |
|              | 1:1       | 0.85         | 18.47                           | 53.8   | 8.45    |
|              | 1:1.2     | 0.84         | 19.31                           | 53.3   | 8.65    |
|              | 1:1.4     | 0.84         | 19.47                           | 54.5   | 8.91    |
|              | 1:1.6     | 0.83         | 19.66                           | 52.3   | 8.53    |
| PM6:ICIF2F   | 1:0.8     | 0.83         | 15.28                           | 46.2   | 5.86    |
|              | 1:1       | 0.83         | 15.45                           | 48.3   | 6.19    |
|              | 1:1.2     | 0.83         | 15.55                           | 48.1   | 6.21    |
|              | 1:1.4     | 0.82         | 15.87                           | 47.9   | 6.23    |
|              | 1:1.6     | 0.82         | 15.91                           | 47.1   | 6.14    |

**Table S2.** Photovoltaic parameters of OSCs based on **PM6**:acceptors(1: 1.4, w/w) with

different additives under the illumination of AM1.5G, 100 mW/cm<sup>2</sup>. The devices were in a conventional architecture ITO/PEDOT:PSS/PM6:acceptors/ZnO/Al.

| Active Layer | Additive | $V_{oc}$ (V) | $J_{sc}$ (mA cm <sup>-2</sup> ) | FF (%) | PCE (%) |
|--------------|----------|--------------|---------------------------------|--------|---------|
| PM6:2FIFIC   | As-cast  | 0.84         | 19.73                           | 50.4   | 8.35    |
|              | 0.5% CN  | 0.82         | 20.80                           | 61.4   | 10.47   |
|              | 1.0% CN  | 0.83         | 20.80                           | 60.0   | 10.36   |
|              | 0.5% DIO | 0.82         | 21.45                           | 58.9   | 10.36   |
|              | 1.0% DIO | 0.82         | 20.17                           | 62.7   | 10.37   |
| PM6:ICIF2F   | As-cast  | 0.82         | 15.89                           | 48.0   | 6.25    |
|              | 0.5% CN  | 0.80         | 18.16                           | 62.4   | 9.07    |
|              | 1.0% CN  | 0.80         | 18.45                           | 61.2   | 9.03    |
|              | 0.5% DIO | 0.81         | 18.23                           | 58.4   | 8.62    |
|              | 1.0% DIO | 0.81         | 18.37                           | 56.7   | 8.44    |

**Table S3.** Photovoltaic parameters of OSCs with PM6: acceptors (1: 1.4, w/w) at different thermal annealing temperatures for 5 min under the illumination of AM1.5G, 100 mW/cm<sup>2</sup>. The devices were in a conventional architecture ITO/PEDOT:PSS/PM6:acceptors/ZnO/Al.

| Active Layer | Additive | Thermal Annealing | $V_{oc}$ (V) | $J_{sc}$ (mA cm <sup>-2</sup> ) | FF (%) | PCE (%) |
|--------------|----------|-------------------|--------------|---------------------------------|--------|---------|
| PM6:2FIFIC   | 0.5% CN  | w/o               | 0.83         | 20.87                           | 63.4   | 10.98   |
|              |          | 90°C              | 0.81         | 21.01                           | 64.9   | 11.04   |
|              |          | 100°C             | 0.80         | 21.60                           | 63.2   | 10.92   |
|              |          | 110°C             | 0.80         | 22.80                           | 62.2   | 11.34   |
|              |          | 120°C             | 0.80         | 22.04                           | 62.5   | 11.02   |
| PM6:ICIF2F   | 0.5% CN  | w/o               | 0.80         | 18.23                           | 62.3   | 9.09    |
|              |          | 90°C              | 0.79         | 19.25                           | 61.9   | 9.41    |
|              |          | 100°C             | 0.79         | 19.34                           | 62.3   | 9.52    |
|              |          | 110°C             | 0.79         | 19.61                           | 62.0   | 9.60    |
|              |          | 120°C             | 0.79         | 19.62                           | 61.5   | 9.53    |



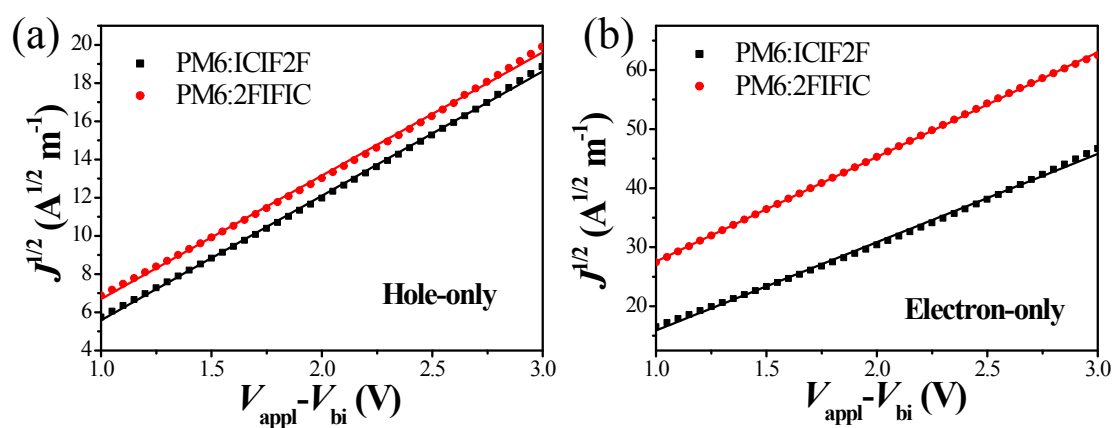

**Fig. S7.** (a) The  $J^{1/2}$ - $V$  curves of the hole-only devices; (b) The  $J^{1/2}$ - $V$  curves of the electron-only devices.

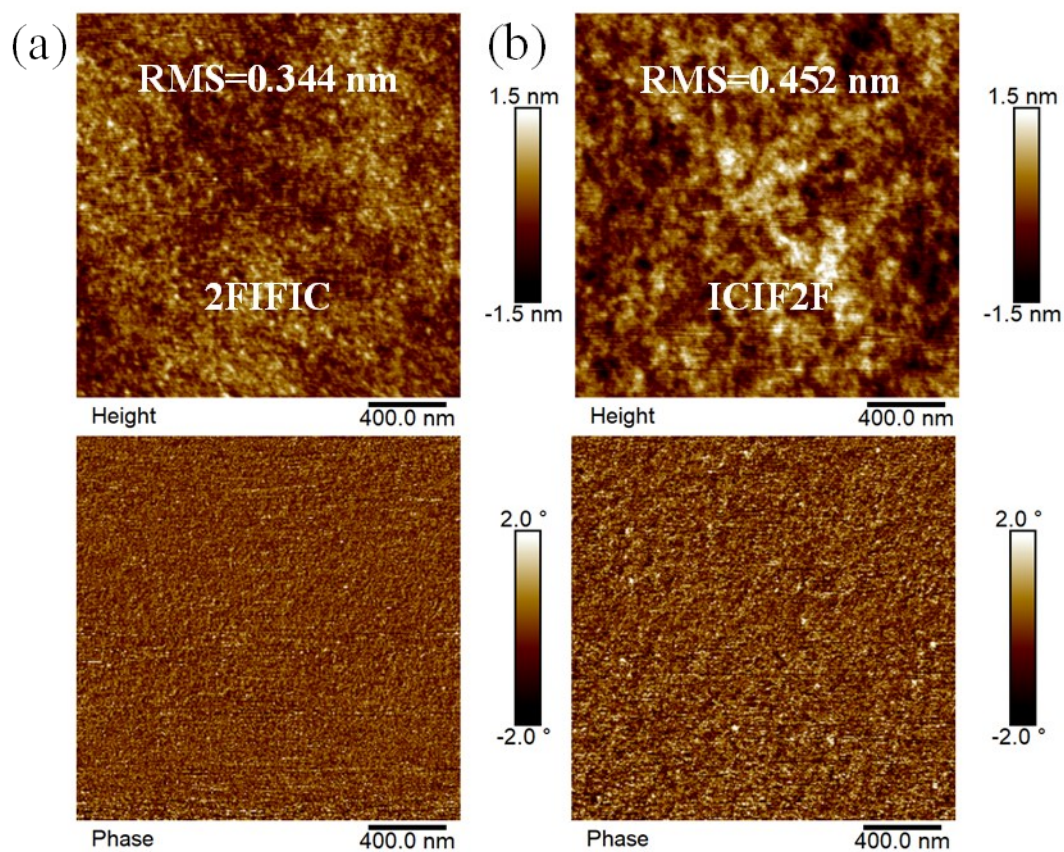

**Fig. S8.** AFM height (up) and phase images (down) of (a) 2FIFIC neat film and (b) ICIF2F neat film.

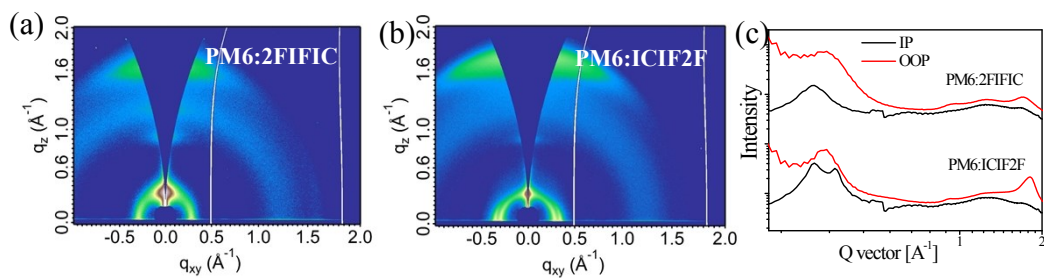

**Fig. S9.** GIWAXS patterns of the optimized blend films based on (a) **PM6:2FIFIC** blend films and (b) **PM6:ICIF2F** and (c) corresponding 1D line cut profiles.

**Table S4** Contact angle of water and diiodomethane (DIM), surface tension of **PM6**, **ICIF2F**, and **2FIFIC**, Flory-Huggins interaction parameter  $\chi$  of two blends.

| Film          | $\theta_{\text{water}}$ [°] | $\theta_{\text{DIM}}$ [°] | $Y_s$ [mN m <sup>-1</sup> ] | $\chi$ [PM6, i] |
|---------------|-----------------------------|---------------------------|-----------------------------|-----------------|
| <b>PM6</b>    | <b>98.2</b>                 | <b>62.4</b>               | <b>28.75</b>                | -               |
| <b>ICIF2F</b> | <b>96.1</b>                 | <b>36.0</b>               | <b>41.57</b>                | <b>1.18</b>     |
| <b>2FIFIC</b> | <b>90.9</b>                 | <b>32.0</b>               | <b>43.71</b>                | <b>1.57</b>     |

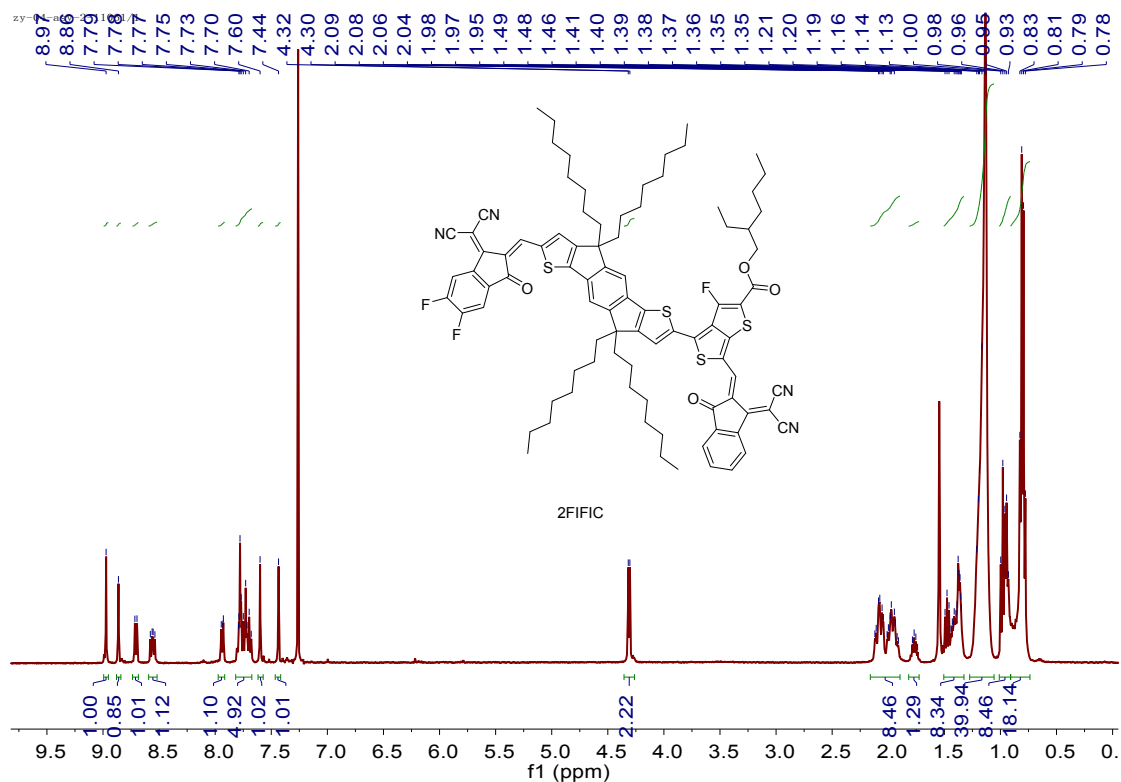

**Fig. S10.** <sup>1</sup>H NMR spectra of **2FIFIC**.

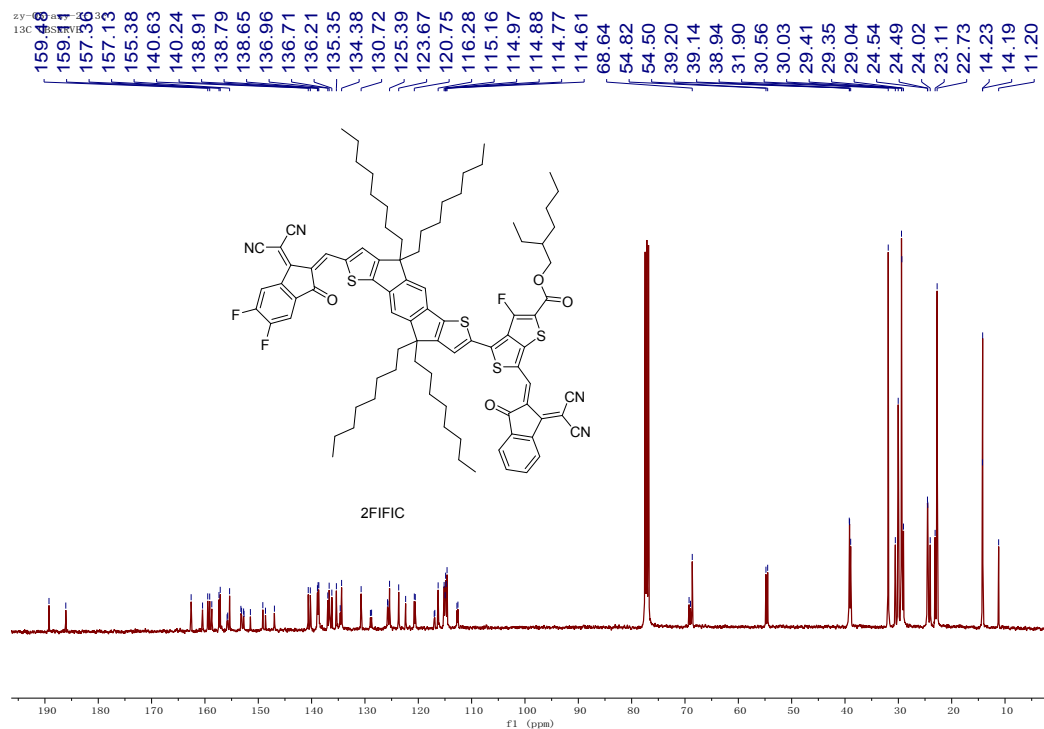

Fig. S11.  $^{13}\text{C}$  NMR spectra of 2FIFIC.

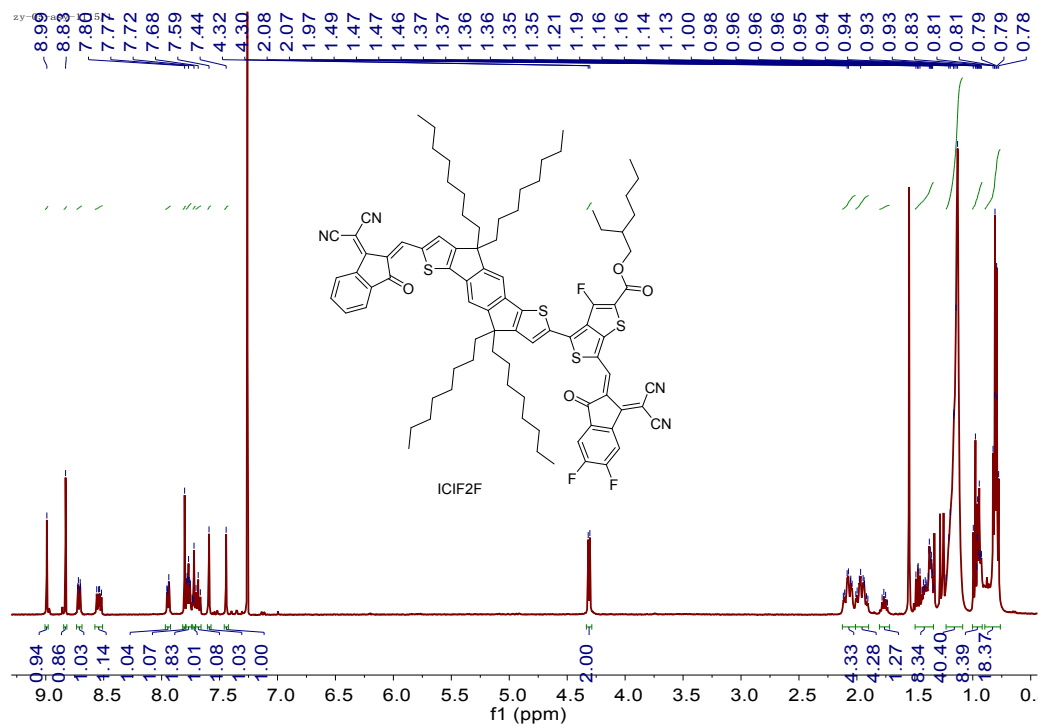

Fig. S12.  $^1\text{H}$  NMR spectra of ICIF2F.

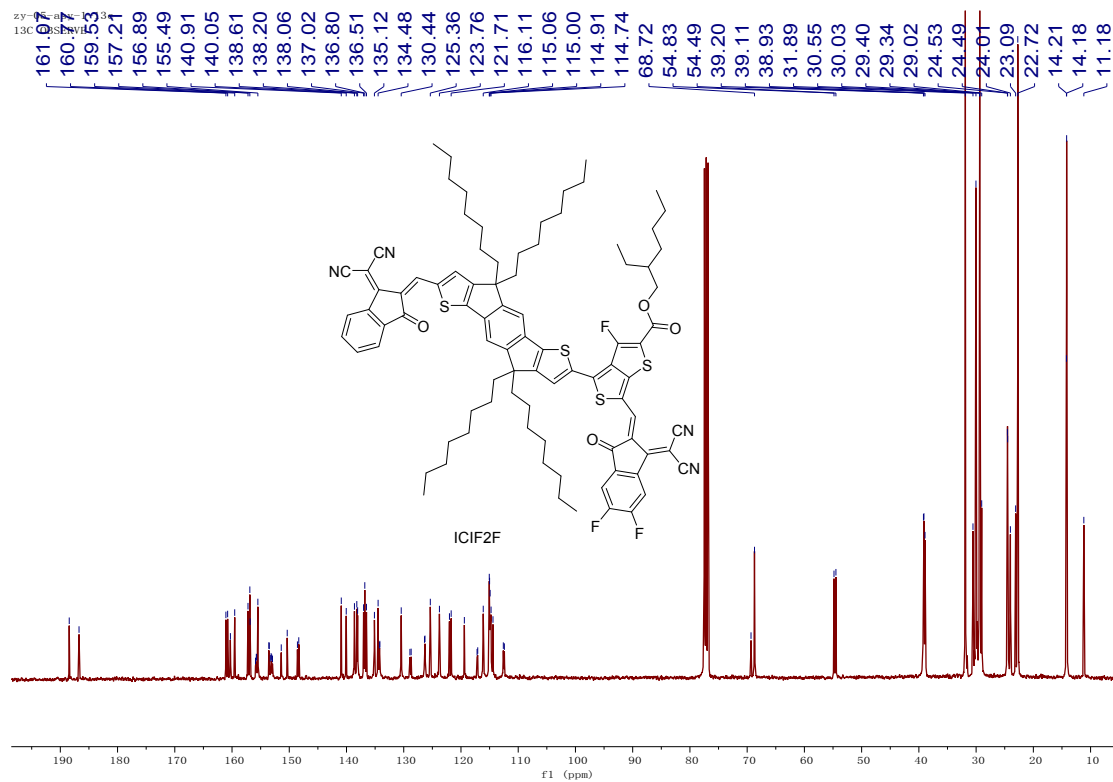

**Fig. S13.**  $^{13}\text{C}$  NMR spectra of ICIF2F.

**References :**

1. F. X. Chen, J. Q. Xu, Z. X. Liu, M. Chen, R. Xia, Y. Yang, T. K. Lau, Y. Zhang, X. Lu, H. L. Yip, A. K. Jen, H. Chen and C. Z. Li, *Adv. Mater.*, 2018, **30**, 1803769.
